# Supplementary material for: Centrifugation, Storage, and Filtration of Olive Oil in an Oil Mill: Effect on the Quality and Content of Minority Compounds
Source: Hindawi journal article supplement (doi:10.1155/2019/7381761), 2019-02-18
Supplement: f1 [file 7381761.f1.docx]

## Supplementary material

**Figure S1**

Comparison of the volatile (A) and phenolic (B) compound content in oil before and after centrifugation. Data at the decanter exit and centrifuge exit. The error bars show the standard deviation.

**Figure S2**

Comparison of the volatile (A) and phenolic (B) compound content in unfiltered and filtered oil. Data at the unfiltered and filtered oils. The error bars show the standard deviation.

| **A** |
| --- |
| **B** |

**Figure S1**

| **A** |
| --- |
| **B** |

**Figure S2**
